# Supplementary material
Source: PubMed Central journal article supplement (PMC7566780)
Supplement: NIHMS1546966-supplement-1.pdf [file NIHMS1546966-supplement-1.pdf]

**List of Supplementary Figures:**

**Figure S1.** Flow cytometry gating strategy for ILC3s

**Figure S2.** Complete blood count (CBC) analysis

S1A.

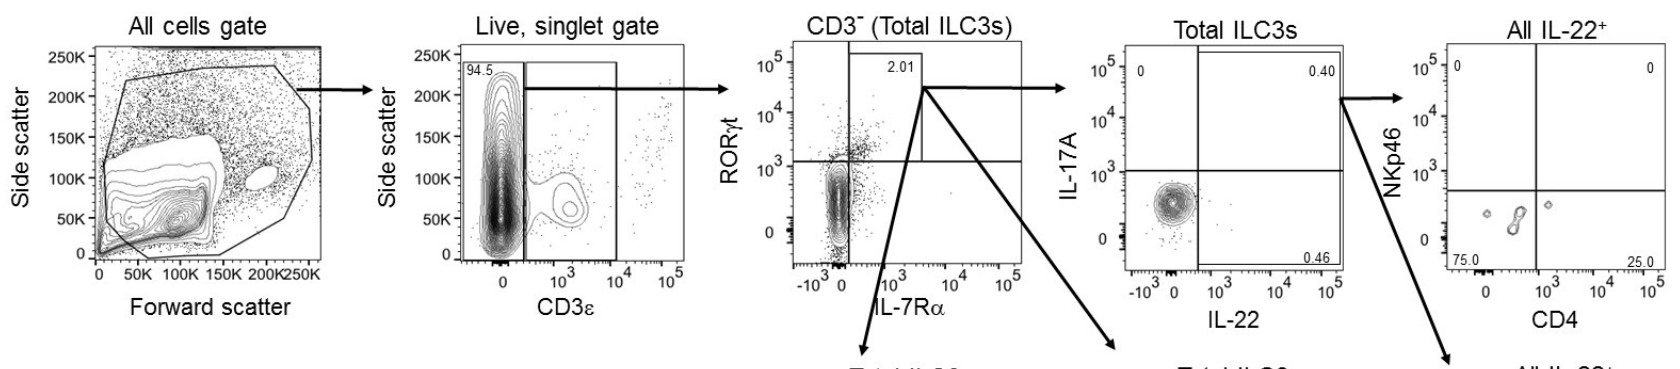

Supplementary Figure 1

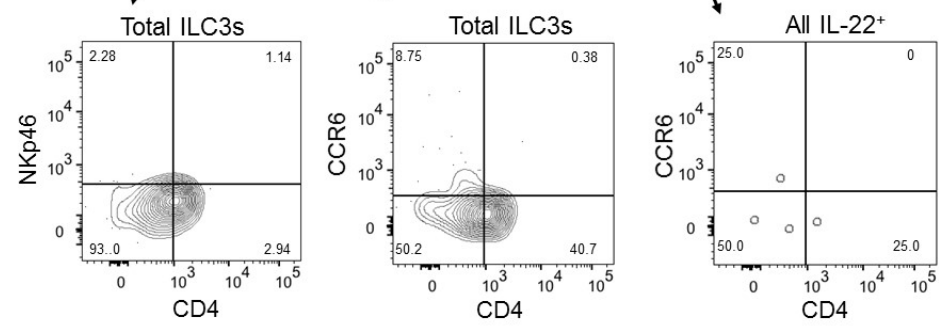

S1B.

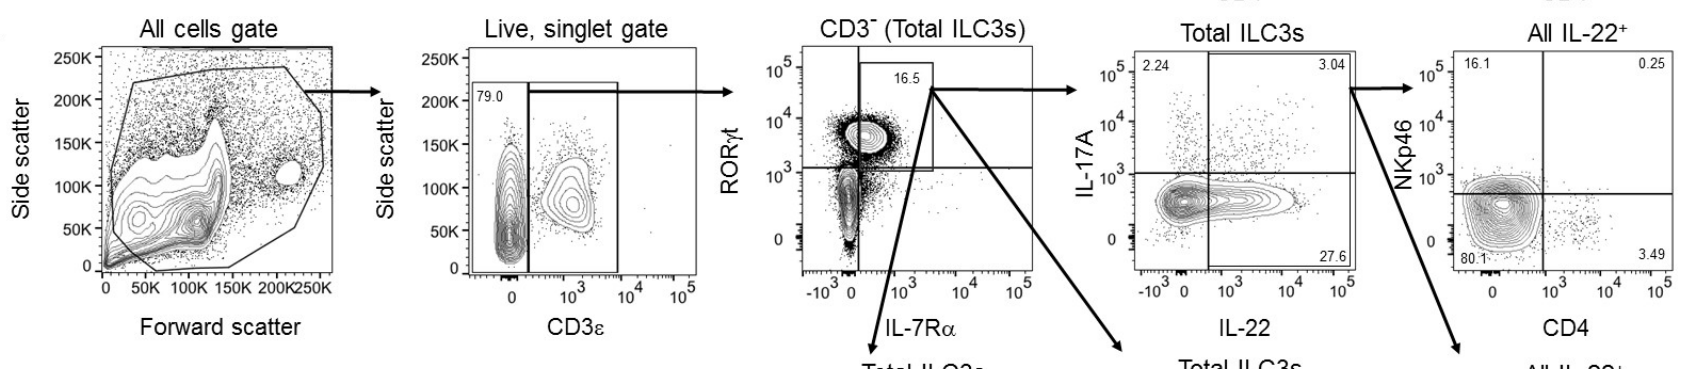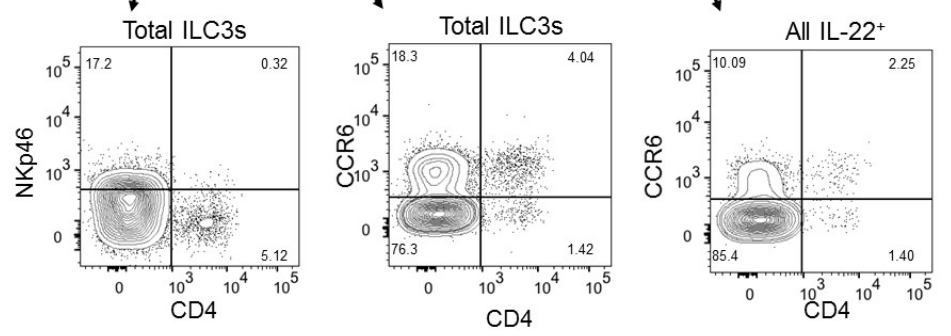

## Supplementary Figure 2

S2A.

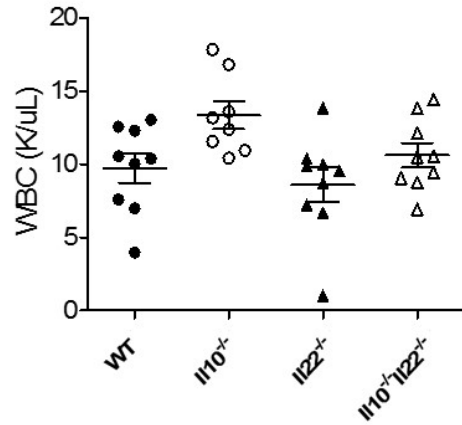

S2B.

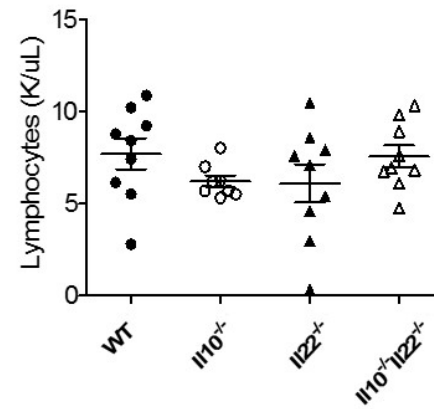

S2C.

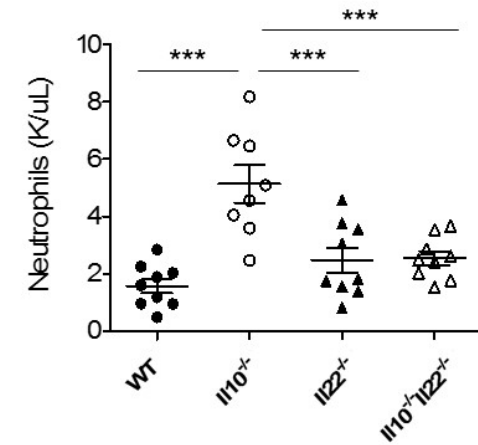

S2D.

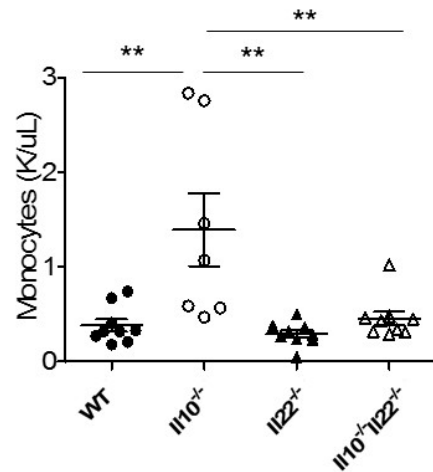

S2E.

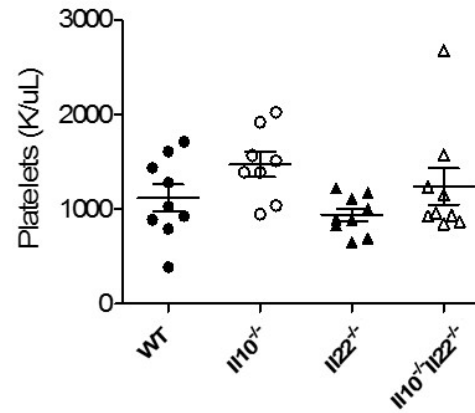

**Supplementary Figure Legends:**

**Supplemental Figure S1. Flow cytometry gating strategy for ILC3s.** Representative flow cytometry plots showing gating strategy for ILC3s in sLPL from (A) WT and (B) *Il10*<sup>-/-</sup> mice. Gates were established on single, live, CD45<sup>+</sup> CD3<sup>-</sup> cells. Cells in this gate that were RORγt<sup>+</sup> IL-7Rα<sup>+</sup> were considered ILC3s (Total ILC3s). The Total ILC3s population was examined for IL-17A and IL-22 expression. A sub-gate on IL-22<sup>+</sup> ILC3s (All IL-22<sup>+</sup>) was used to determine the percentages of IL-22-producing ILC3 subsets based on NKp46 or CCR6 (+/- CD4). Also, the Total ILC3s gate was examined to determine the percentages of ILC3 subsets based on NKp46 or CCR6 (+/- CD4).

**Supplemental Figure S2: Complete blood count (CBC) analysis.** (A) WBC, (B) lymphocyte (C) monocyte (D) neutrophil and (E) platelet frequencies in peripheral blood of WT, *Il10*<sup>-/-</sup>, *Il22*<sup>-/-</sup>, and *Il10*<sup>-/-</sup> *Il22*<sup>-/-</sup> mice (n= 9-10 per group) (\*\*\*, p<0.001, \*\*, p<0.01, using the Mann-Whitney *U* test (error bars represent SD).

**List of Supplementary Tables:**

**Table S1.** Genes differentially expressed in both  $Il10^{-/-}$  and  $Il10^{-/-}Il22^{-/-}$  mice compared to WT (Group 1)

**Table S2.** Genes differentially expressed in  $Il10^{-/-}Il22^{-/-}$  mice only compared to WT (Group 2)

**Table S3.** Genes differentially expressed in  $Il10^{-/-}$  mice only compared to WT (Group 3)

**Table S4.** (a) Chao1 Statistics and (b) Shannon Statistics from fecal microbiome analysis

**Table S5.** List of significantly different taxa in fecal microbiome

**Supplementary Table 1: Genes differentially expressed in both *Il10*<sup>-/-</sup> and *Il10*<sup>-/-</sup>*Il22*<sup>-/-</sup> mice compared to WT (Group 1)**

| Gene          | <i>Il10</i> <sup>-/-</sup> (compared to WT) |                 | <i>Il10</i> <sup>-/-</sup> <i>Il22</i> <sup>-/-</sup> (compared to WT) |                 |
|---------------|---------------------------------------------|-----------------|------------------------------------------------------------------------|-----------------|
|               | p-value                                     | Fold-difference | p-value                                                                | Fold-difference |
| <i>Abcb1a</i> | 0.00238447                                  | -2.9            | 0.00106374                                                             | -3.3            |
| <i>Alox5</i>  | 0.00292459                                  | -2.2            | 2.09E-05                                                               | -4.4            |
| <i>Aoah</i>   | 1.02E-07                                    | 3.2             | 5.68E-06                                                               | 2.2             |
| <i>Aoc3</i>   | 0.00628964                                  | -2.4            | 0.0094028                                                              | -2.3            |
| <i>B2m</i>    | 2.04E-06                                    | 5.7             | 3.62E-06                                                               | 5.2             |
| <i>Bdkrb1</i> | 0.0081094                                   | 2.6             | 0.00864262                                                             | 2.6             |
| <i>Bmp3</i>   | 0.0061224                                   | -2.8            | 0.00206836                                                             | -3.4            |
| <i>C2</i>     | 6.62E-07                                    | 11.6            | 1.82E-05                                                               | 5.9             |
| <i>C3</i>     | 5.03E-05                                    | 5.2             | 0.0106775                                                              | 2.2             |
| <i>Ccl1</i>   | 0.00670074                                  | 932.6           | 0.00871763                                                             | 693.3           |
| <i>Ccl2</i>   | 0.00200778                                  | 3.9             | 0.009145                                                               | 2.9             |
| <i>Ccl20</i>  | 0.00161736                                  | 3.9             | 0.000276811                                                            | 5.5             |
| <i>Ccl22</i>  | 0.00195491                                  | 8.1             | 0.000141201                                                            | 18.3            |
| <i>Ccl5</i>   | 2.04E-05                                    | 31.5            | 6.16E-05                                                               | 21.5            |
| <i>Ccl5</i>   | 0.00011631                                  | 18.2            | 0.000193779                                                            | 15.5            |
| <i>Ccl7</i>   | 0.000495421                                 | 5.5             | 0.0015497                                                              | 4.3             |
| <i>Ccl8</i>   | 4.53E-05                                    | 5.4             | 0.000111651                                                            | 4.6             |
| <i>Ccr1</i>   | 0.00493682                                  | 2.0             | 0.00159636                                                             | 2.3             |
| <i>Ccr5</i>   | 2.13E-05                                    | 7.3             | 3.87E-05                                                               | 6.4             |
| <i>Cd14</i>   | 7.41E-06                                    | 3.5             | 0.000524014                                                            | 2.2             |
| <i>Cd274</i>  | 5.28E-05                                    | 6.9             | 2.04E-05                                                               | 8.5             |
| <i>Cd4</i>    | 0.00528985                                  | 4.1             | 0.000902417                                                            | 6.3             |
| <i>Cd74</i>   | 1.47E-09                                    | 16.2            | 1.44E-09                                                               | 16.2            |
| <i>Chrna7</i> | 0.00575245                                  | -2.8            | 0.00548288                                                             | -2.8            |
| <i>Cmtm5</i>  | 0.0014076                                   | -3.8            | 0.00865433                                                             | -2.7            |
| <i>Csf2</i>   | 0.0013231                                   | 400.9           | 0.000847815                                                            | 576.3           |
| <i>Csf2rb</i> | 0.00793234                                  | 3.1             | 0.00358386                                                             | 3.6             |
| <i>Ctla4</i>  | 0.000165893                                 | 17.4            | 0.000127399                                                            | 19.0            |
| <i>Cxcl1</i>  | 0.000250708                                 | 17.2            | 0.00246616                                                             | 8.3             |
| <i>Cxcl1</i>  | 0.000808265                                 | 10.6            | 0.0050476                                                              | 6.2             |
| <i>Cxcl10</i> | 0.00711367                                  | 11.6            | 0.00180348                                                             | 20.5            |
| <i>Cxcl3</i>  | 0.00219792                                  | 2905.3          | 0.00430579                                                             | 1363.1          |
| <i>Cxcl5</i>  | 0.00102204                                  | 7.4             | 0.0105547                                                              | 4.0             |
| <i>Cxcl9</i>  | 0.00155534                                  | 529.7           | 0.000529753                                                            | 1363.6          |
| <i>Cxcr3</i>  | 0.00102082                                  | 4.5             | 0.00823312                                                             | 3.0             |
| <i>Cybb</i>   | 0.00546101                                  | 2.5             | 0.00145411                                                             | 3.1             |
| <i>Fasl</i>   | 0.00163608                                  | 1305.3          | 0.00218593                                                             | 981.4           |
| <i>Fpr1</i>   | 5.11E-05                                    | 2961.2          | 0.000324966                                                            | 654.3           |
| <i>H2-Q10</i> | 0.00186128                                  | 2.5             | 0.000200172                                                            | 3.4             |

|                |             |         |             |         |
|----------------|-------------|---------|-------------|---------|
| <i>Icos</i>    | 0.00548041  | 3.9     | 0.000307301 | 7.5     |
| <i>Ifng</i>    | 8.58E-06    | 20944.0 | 1.25E-05    | 14427.2 |
| <i>Il12b</i>   | 0.00129804  | 1004.3  | 0.00161049  | 822.2   |
| <i>Il12rb1</i> | 0.000417435 | 6.1     | 0.000538028 | 5.8     |
| <i>Il12rb2</i> | 0.00405627  | 731.5   | 0.00442055  | 670.5   |
| <i>Il15</i>    | 0.000423708 | -2.6    | 0.000807622 | -2.4    |
| <i>Il17a</i>   | 1.19E-05    | 4274.3  | 5.01E-06    | 9099.0  |
| <i>Il18bp</i>  | 3.62E-08    | 15.7    | 2.14E-06    | 6.6     |
| <i>Il1a</i>    | 0.00614955  | 12.7    | 0.00502956  | 13.8    |
| <i>Il1b</i>    | 0.0020318   | 24.5    | 0.00348555  | 19.2    |
| <i>Il1b</i>    | 0.002002    | 21.0    | 0.00178113  | 22.1    |
| <i>Il1f9</i>   | 0.0020701   | 1090.1  | 0.00128751  | 1749.8  |
| <i>Il2rg</i>   | 0.00566712  | 3.0     | 0.0052451   | 3.1     |
| <i>Il7r</i>    | 0.001827    | 3.4     | 0.00151092  | 3.5     |
| <i>Itgb2</i>   | 0.00153147  | 2.6     | 0.00182944  | 2.6     |
| <i>Lilrb3</i>  | 1.89E-05    | 3.5     | 0.000369535 | 2.4     |
| <i>Ltf</i>     | 0.000943918 | 24.8    | 0.00188895  | 18.6    |
| <i>Lyn</i>     | 1.97E-05    | 2.5     | 4.24E-05    | 2.3     |
| <i>Mefv</i>    | 0.00104442  | 4.5     | 0.00021368  | 6.2     |
| <i>Nlrp3</i>   | 0.00496957  | 5.3     | 0.00401091  | 5.6     |
| <i>Nod2</i>    | 0.00112751  | 3.3     | 0.00171035  | 3.1     |
| <i>Nos2</i>    | 1.69E-07    | 186.2   | 3.68E-07    | 129.8   |
| <i>Pglyrp1</i> | 7.15E-05    | 3.1     | 0.000130999 | 2.9     |
| <i>Prg2</i>    | 0.000127271 | 6.9     | 0.000163568 | 6.5     |
| <i>S100a8</i>  | 2.59E-05    | 195.8   | 0.000635859 | 39.1    |
| <i>S100a8</i>  | 1.52E-05    | 166.0   | 0.000285891 | 40.8    |
| <i>S100a9</i>  | 0.000199177 | 50.4    | 0.000778043 | 27.7    |
| <i>S1pr3</i>   | 0.000105757 | -2.7    | 0.000456266 | -2.3    |
| <i>Saa3</i>    | 0.000355516 | 970.9   | 0.00032095  | 1057.1  |
| <i>Socs1</i>   | 0.00154115  | 7.9     | 0.00401311  | 6.0     |
| <i>Tlr11</i>   | 0.00697523  | 3.1     | 0.00642618  | 3.1     |
| <i>Tlr13</i>   | 8.70E-05    | 2.6     | 0.000187492 | 2.4     |
| <i>Tlr9</i>    | 0.0069402   | 2.0     | 0.00253182  | 2.3     |
| <i>Tnf</i>     | 8.18E-07    | 21.4    | 2.83E-06    | 15.2    |
| <i>Tnfrsf8</i> | 0.000306257 | 27.0    | 8.58E-05    | 45.3    |
| <i>Tnfrsf9</i> | 0.00347227  | 6.8     | 0.000956495 | 10.0    |
| <i>Tnfsf10</i> | 2.25E-06    | 4.8     | 4.29E-06    | 4.3     |
| <i>Unc13d</i>  | 0.00405847  | 2.3     | 0.00846253  | 2.1     |

**Supplementary Table 2: Genes differentially expressed in *Il10*<sup>-/-</sup>*Il22*<sup>-/-</sup> mice only compared to WT (Group 2)**

| Gene                           | p-value     | Fold-difference |
|--------------------------------|-------------|-----------------|
| <i>Alox5</i>                   | 0.00479949  | -3.7            |
| <i>Bmp3</i>                    | 0.000629089 | -3.9            |
| <i>C8g</i>                     | 0.00138908  | -2.9            |
| <i>Cav1</i>                    | 0.00342036  | -2.3            |
| <i>Ccl17</i>                   | 0.000851116 | 7.0             |
| <i>Cd163</i>                   | 0.00818285  | -5.5            |
| <i>Cd180</i>                   | 0.00735117  | 2.1             |
| <i>Cd40</i>                    | 0.00673335  | 3.2             |
| <i>Cd40lg</i>                  | 0.00908089  | 216.8           |
| <i>Cebpa</i>                   | 4.26E-08    | -83.5           |
| <i>Cebpb</i>                   | 5.92E-07    | -19914.1        |
| <i>Cftr</i>                    | 0.000168215 | -2.1            |
| <i>Cmtm4</i>                   | 0.0044312   | -2.0            |
| <i>Cntnap1</i>                 | 0.00613507  | -2.4            |
| <i>Ctfl</i>                    | 0.00392415  | -5.3            |
| <i>Cxcl14</i>                  | 0.00522238  | 2.0             |
| <i>Cxcl16</i>                  | 0.00186368  | 2.1             |
| <i>Fpr3</i>                    | 0.00709804  | 8732.9          |
| <i>Gdf15</i>                   | 0.00744193  | -2.3            |
| <i>Il12b</i>                   | 0.00908872  | 531.3           |
| <i>Il17d</i>                   | 0.000267927 | -2.8            |
| <i>Il18</i>                    | 3.79E-06    | -5.6            |
| <i>Il18rap</i>                 | 0.00923122  | 55.8            |
| <i>Il1rl2</i>                  | 0.00559334  | -2.3            |
| <i>Kit</i>                     | 0.00434982  | -2.5            |
| <i>P2rx1</i>                   | 0.00328103  | -4.4            |
| <i>Ptn</i>                     | 0.0073677   | -2.4            |
| <i>Tgfb2</i>                   | 0.000915831 | -2.0            |
| <i>Tnfrsf11b</i>               | 0.00528023  | 3.0             |
| <i>Tnfrsf4</i>                 | 0.00211631  | 2.8             |
| <i>Tnfsf12;Tnfsf12-tnfsf13</i> | 0.0022568   | -2.4            |
| <i>Tpst1</i>                   | 0.00142718  | -2.1            |
| <i>Xcr1</i>                    | 0.00416754  | 4.8             |



**Supplementary Table 3: Genes differentially expressed in *Il10*<sup>-/-</sup> mice only compared to WT (Group 3)**

| <b>Gene</b>     | <b>p-value</b> | <b>Fold-difference</b> |
|-----------------|----------------|------------------------|
| <i>A2m</i>      | 0.00957883     | 718.3                  |
| <i>Adoral</i>   | 0.00407501     | 3.6                    |
| <i>Aif1</i>     | 3.52E-05       | 2.7                    |
| <i>C6</i>       | 0.00909242     | 70.2                   |
| <i>Ccl11</i>    | 0.00819481     | 2.1                    |
| <i>Ccr2</i>     | 4.24E-05       | 2.5                    |
| <i>Cfb</i>      | 0.00028884     | 2.3                    |
| <i>Cfh</i>      | 1.26E-05       | 3.7                    |
| <i>Cxcl2</i>    | 0.00932489     | 397.7                  |
| <i>Ebi3</i>     | 0.0081765      | 2.3                    |
| <i>Fam3b</i>    | 2.80E-05       | 3.0                    |
| <i>Fcer1g</i>   | 0.0104187      | 2.0                    |
| <i>Fgf23</i>    | 0.0102809      | 976.1                  |
| <i>Foxp3</i>    | 0.0105366      | 373.5                  |
| <i>Ghrl</i>     | 0.00764176     | 4.8                    |
| <i>Grem1</i>    | 0.00014261     | 2.2                    |
| <i>Il21</i>     | 0.00195555     | 1991.6                 |
| <i>Il22</i>     | 0.00126662     | 168.7                  |
| <i>Il27ra</i>   | 0.00687286     | 6.1                    |
| <i>Il3ra</i>    | 0.000225822    | 2.1                    |
| <i>Il4ra</i>    | 0.00182328     | 2.4                    |
| <i>Irf7</i>     | 0.000510782    | 2.2                    |
| <i>Jak3</i>     | 0.00500189     | 2.6                    |
| <i>Klrg1</i>    | 0.00639306     | 3.8                    |
| <i>Lbp</i>      | 0.000143654    | 4.5                    |
| <i>Ltb</i>      | 0.0092582      | 3.8                    |
| <i>Ly75</i>     | 1.95E-05       | 2.3                    |
| <i>Ly86</i>     | 0.000461109    | 2.9                    |
| <i>Muc1</i>     | 1.49E-06       | 7.0                    |
| <i>Muc4</i>     | 0.000305016    | 3.1                    |
| <i>Pla2g2e</i>  | 0.0082277      | 2.6                    |
| <i>Pla2g4c</i>  | 0.00461715     | 2.7                    |
| <i>Pxdn</i>     | 0.00130812     | -2.0                   |
| <i>Reg3g</i>    | 0.000488335    | 4861.7                 |
| <i>Saal</i>     | 0.00129597     | 3.2                    |
| <i>Socs2</i>    | 0.000726173    | -3.2                   |
| <i>Tfrc</i>     | 5.84E-05       | 2.8                    |
| <i>Thpo</i>     | 0.000263784    | 2.6                    |
| <i>Tlr3</i>     | 0.000782639    | 2.1                    |
| <i>Tnfrsf18</i> | 0.00466065     | 2.2                    |
| <i>Tnfrsf1b</i> | 0.00068281     | 3.2                    |
| <i>Twist1</i>   | 0.00709812     | -2.6                   |

## Supplementary Table 4: Alpha diversity statistics from fecal microbiome analysis

| <b>Table 4a. Chao1 index: statistics from fecal microbiome analysis</b>       |                                             |                     |                     |                |
|-------------------------------------------------------------------------------|---------------------------------------------|---------------------|---------------------|----------------|
| <b>Group 1</b>                                                                | <b>Group 2</b>                              | <b>Group 1 mean</b> | <b>Group 2 mean</b> | <b>p-value</b> |
| <i>II10<sup>-/-</sup></i>                                                     | WT                                          | 474.4122            | 527.8155            | 0.102          |
| WT                                                                            | <i>II22<sup>-/-</sup></i>                   | 527.8155            | 586.4659            | 0.03           |
| <i>II10<sup>-/-</sup>II22<sup>-/-</sup></i>                                   | WT                                          | 566.3712            | 527.8155            | 0.192          |
| <i>II10<sup>-/-</sup></i>                                                     | <i>II22<sup>-/-</sup></i>                   | 474.4122            | 586.4659            | 0.006          |
| <i>II10<sup>-/-</sup></i>                                                     | <i>II10<sup>-/-</sup>II22<sup>-/-</sup></i> | 474.4122            | 566.3712            | 0.012          |
| <i>II10<sup>-/-</sup>II22<sup>-/-</sup></i>                                   | <i>II22<sup>-/-</sup></i>                   | 566.3712            | 586.4659            | 1              |
| <b>Table 4b. Shannon diversity: statistics from fecal microbiome analysis</b> |                                             |                     |                     |                |
| <b>Group 1</b>                                                                | <b>Group 2</b>                              | <b>Group 1 mean</b> | <b>Group 2 mean</b> | <b>p-value</b> |
| <i>II10<sup>-/-</sup></i>                                                     | WT                                          | 6.339657            | 6.044052            | 0.15           |
| WT                                                                            | <i>II22<sup>-/-</sup></i>                   | 6.044052            | 6.375445            | 0.12           |
| <i>II10<sup>-/-</sup>II22<sup>-/-</sup></i>                                   | WT                                          | 5.684859            | 6.044052            | 0.528          |
| <i>II10<sup>-/-</sup></i>                                                     | <i>II22<sup>-/-</sup></i>                   | 5.684859            | 6.375445            | 0.006          |
| <i>II10<sup>-/-</sup></i>                                                     | <i>II10<sup>-/-</sup>II22<sup>-/-</sup></i> | 5.684859            | 6.339657            | 0.018          |
| <i>II10<sup>-/-</sup>II22<sup>-/-</sup></i>                                   | <i>II22<sup>-/-</sup></i>                   | 6.339657            | 6.375445            | 1              |

Supplementary Table 5: Significantly different taxa in fecal microbiome identified by LEfSe analysis

| Taxa                                                                                                                                     | Strain                                                  | LDA Score (log 10) | P value  |
|------------------------------------------------------------------------------------------------------------------------------------------|---------------------------------------------------------|--------------------|----------|
| <i>Proteobacteria</i>                                                                                                                    | WT                                                      | 4.276              | 1.50E-04 |
| <i>Proteobacteria</i> / <i>Epsilonproteobacteria</i>                                                                                     | WT                                                      | 4.214              | 1.29E-06 |
| <i>Proteobacteria</i> / <i>Epsilonproteobacteria</i> / <i>Campylobacteriales</i>                                                         | WT                                                      | 4.214              | 1.29E-06 |
| <i>Proteobacteria</i> / <i>Epsilonproteobacteria</i> / <i>Campylobacteriales</i> / <i>Helicobacteraceae</i>                              | WT                                                      | 4.214              | 1.29E-06 |
| <i>Proteobacteria</i> / <i>Epsilonproteobacteria</i> / <i>Campylobacteriales</i> / <i>Helicobacteraceae</i> / <i>Helicobacter</i>        | WT                                                      | 4.214              | 1.29E-06 |
| <i>Firmicutes</i> / <i>Clostridia</i> /                                                                                                  | WT                                                      | 3.599              | 1.93E-02 |
| <i>Firmicutes</i> / <i>Clostridia</i> /                                                                                                  | WT                                                      | 3.599              | 1.93E-02 |
| <i>Firmicutes</i> / <i>Clostridia</i> /                                                                                                  | WT                                                      | 3.599              | 1.93E-02 |
| <i>Firmicutes</i> / <i>Bacilli</i> / <i>Bacillales</i> / <i>Staphylococcaceae</i>                                                        | WT                                                      | 3.233              | 7.77E-04 |
| <i>Firmicutes</i> / <i>Bacilli</i> / <i>Bacillales</i>                                                                                   | WT                                                      | 3.227              | 4.45E-04 |
| <i>Firmicutes</i> / <i>Bacilli</i> / <i>Bacillales</i> / <i>Planococcaceae</i>                                                           | WT                                                      | 3.080              | 2.79E-02 |
| <i>Firmicutes</i> / <i>Bacilli</i> / <i>Bacillales</i> / <i>Planococcaceae</i> / <i>Sporosarcina</i>                                     | WT                                                      | 3.038              | 2.79E-02 |
| <i>Firmicutes</i> / <i>Clostridia</i> / <i>Clostridiales</i> / <i>Dehalobacteriaceae</i>                                                 | WT                                                      | 2.824              | 2.87E-04 |
| <i>Firmicutes</i> / <i>Clostridia</i> / <i>Clostridiales</i> / <i>Dehalobacteriaceae</i> / <i>Dehalobacterium</i>                        | WT                                                      | 2.822              | 2.87E-04 |
| <i>Firmicutes</i> / <i>Bacilli</i> / <i>Bacillales</i> / <i>Staphylococcaceae</i> /                                                      | WT                                                      | 2.167              | 5.06E-07 |
| <i>Bacteroidetes</i> / <i>Bacteroidia</i> / <i>Bacteroidales</i> / <i>Bacteroidaceae</i>                                                 | <i>II10</i> <sup>-/-</sup>                              | 4.711              | 7.42E-06 |
| <i>Bacteroidetes</i> / <i>Bacteroidia</i> / <i>Bacteroidales</i> / <i>Bacteroidaceae</i> /                                               | <i>II10</i> <sup>-/-</sup>                              | 4.482              | 2.75E-08 |
| <i>Bacteroidetes</i> / <i>Bacteroidia</i> / <i>Bacteroidales</i> /                                                                       | <i>II10</i> <sup>-/-</sup>                              | 4.198              | 7.38E-06 |
| <i>Bacteroidetes</i> / <i>Bacteroidia</i> / <i>Bacteroidales</i> /                                                                       | <i>II10</i> <sup>-/-</sup>                              | 4.198              | 7.38E-06 |
| <i>Firmicutes</i> / <i>Erysipelotrichi</i> / <i>Erysipelotrichales</i> / <i>_Coproba</i> <i>cillaceae</i>                                | <i>II10</i> <sup>-/-</sup>                              | 3.997              | 1.67E-07 |
| <i>Firmicutes</i> / <i>Erysipelotrichi</i> / <i>Erysipelotrichales</i> / <i>_Coproba</i> <i>cillaceae</i> / <i>Coproba</i> <i>cillus</i> | <i>II10</i> <sup>-/-</sup>                              | 3.827              | 8.65E-07 |
| <i>Proteobacteria</i> / <i>Deltaproteobacteria</i> / <i>Desulfovibrionales</i> / <i>Desulfovibrionaceae</i> / <i>Desulfovibrio</i>       | <i>II10</i> <sup>-/-</sup>                              | 3.675              | 1.16E-02 |
| <i>Firmicutes</i> / <i>Erysipelotrichi</i> / <i>Erysipelotrichales</i> / <i>_Coproba</i> <i>cillaceae</i> / <i>_</i>                     | <i>II10</i> <sup>-/-</sup>                              | 3.507              | 4.86E-05 |
| <i>Proteobacteria</i> / <i>Betaproteobacteria</i> / <i>Burkholderiales</i>                                                               | <i>II10</i> <sup>-/-</sup>                              | 3.440              | 4.44E-06 |
| <i>Proteobacteria</i> / <i>Betaproteobacteria</i> / <i>Burkholderiales</i> / <i>Alcaligenaceae</i>                                       | <i>II10</i> <sup>-/-</sup>                              | 3.440              | 4.44E-06 |
| <i>Proteobacteria</i> / <i>Betaproteobacteria</i> / <i>Burkholderiales</i> / <i>Alcaligenaceae</i> / <i>Sutterella</i>                   | <i>II10</i> <sup>-/-</sup>                              | 3.440              | 4.44E-06 |
| <i>Proteobacteria</i> / <i>Betaproteobacteria</i>                                                                                        | <i>II10</i> <sup>-/-</sup>                              | 3.440              | 4.57E-06 |
| <i>Proteobacteria</i> / <i>Gammaproteobacteria</i> / <i>Pasteurellales</i> / <i>Pasteurellaceae</i> / <i>Aggregatibacter</i>             | <i>II10</i> <sup>-/-</sup>                              | 3.253              | 7.48E-06 |
| <i>Proteobacteria</i> / <i>Gammaproteobacteria</i> / <i>Pasteurellales</i>                                                               | <i>II10</i> <sup>-/-</sup>                              | 2.983              | 2.58E-05 |
| <i>Proteobacteria</i> / <i>Deltaproteobacteria</i> / <i>Desulfovibrionales</i> / <i>Desulfovibrionaceae</i> / <i>Bilophila</i>           | <i>II10</i> <sup>-/-</sup>                              | 2.822              | 3.95E-05 |
| <i>Proteobacteria</i> / <i>Gammaproteobacteria</i> / <i>Pasteurellales</i> / <i>Pasteurellaceae</i>                                      | <i>II10</i> <sup>-/-</sup>                              | 2.745              | 2.58E-05 |
| <i>Firmicutes</i> / <i>Bacilli</i> / <i>Lactobacillales</i> / <i>Carnobacteriaceae</i>                                                   | <i>II10</i> <sup>-/-</sup>                              | 2.634              | 2.71E-05 |
| <i>Firmicutes</i> / <i>Bacilli</i> / <i>Lactobacillales</i> / <i>Carnobacteriaceae</i> / <i>Granulicatella</i>                           | <i>II10</i> <sup>-/-</sup>                              | 2.633              | 2.71E-05 |
| <i>Firmicutes</i> / <i>Bacilli</i> / <i>Lactobacillales</i> / <i>Streptococcaceae</i> / <i>Streptococcus</i>                             | <i>II10</i> <sup>-/-</sup>                              | 2.379              | 1.19E-04 |
| <i>Bacteroidetes</i> / <i>Bacteroidia</i> / <i>Bacteroidales</i> / <i>S24_7</i>                                                          | <i>II22</i> <sup>-/-</sup>                              | 4.954              | 7.55E-03 |
| <i>Bacteroidetes</i> / <i>Bacteroidia</i> / <i>Bacteroidales</i> / <i>S24_7</i> /                                                        | <i>II22</i> <sup>-/-</sup>                              | 4.954              | 7.55E-03 |
| <i>Firmicutes</i> / <i>Bacilli</i> / <i>Turicibacteriales</i>                                                                            | <i>II22</i> <sup>-/-</sup>                              | 3.952              | 2.43E-08 |
| <i>Firmicutes</i> / <i>Bacilli</i> / <i>Turicibacteriales</i> / <i>Turicibacteraceae</i>                                                 | <i>II22</i> <sup>-/-</sup>                              | 3.952              | 2.43E-08 |
| <i>Firmicutes</i> / <i>Bacilli</i> / <i>Turicibacteriales</i> / <i>Turicibacteraceae</i> / <i>Turicibacter</i>                           | <i>II22</i> <sup>-/-</sup>                              | 3.952              | 2.43E-08 |
| <i>Actinobacteria</i> / <i>Actinobacteria</i> / <i>Bifidobacteriales</i>                                                                 | <i>II22</i> <sup>-/-</sup>                              | 3.756              | 1.38E-05 |
| <i>Actinobacteria</i> / <i>Actinobacteria</i> / <i>Bifidobacteriales</i> / <i>Bifidobacteriaceae</i>                                     | <i>II22</i> <sup>-/-</sup>                              | 3.756              | 1.38E-05 |
| <i>Actinobacteria</i> / <i>Actinobacteria</i> / <i>Bifidobacteriales</i> / <i>Bifidobacteriaceae</i> / <i>Bifidobacterium</i>            | <i>II22</i> <sup>-/-</sup>                              | 3.756              | 1.38E-05 |
| <i>Actinobacteria</i>                                                                                                                    | <i>II22</i> <sup>-/-</sup>                              | 3.756              | 7.22E-05 |
| <i>Actinobacteria</i> / <i>Actinobacteria</i>                                                                                            | <i>II22</i> <sup>-/-</sup>                              | 3.756              | 7.22E-05 |
| <i>Cyanobacteria</i>                                                                                                                     | <i>II22</i> <sup>-/-</sup>                              | 3.306              | 1.26E-09 |
| <i>Cyanobacteria</i> / <i>4C0d_2</i>                                                                                                     | <i>II22</i> <sup>-/-</sup>                              | 3.305              | 1.26E-09 |
| <i>Cyanobacteria</i> / <i>4C0d_2</i> / <i>YS2</i> /                                                                                      | <i>II22</i> <sup>-/-</sup>                              | 3.305              | 1.26E-09 |
| <i>Cyanobacteria</i> / <i>4C0d_2</i> / <i>YS2</i>                                                                                        | <i>II22</i> <sup>-/-</sup>                              | 3.305              | 1.26E-09 |
| <i>Cyanobacteria</i> / <i>4C0d_2</i> / <i>YS2</i> /                                                                                      | <i>II22</i> <sup>-/-</sup>                              | 3.305              | 1.26E-09 |
| <i>Firmicutes</i> / <i>Erysipelotrichi</i> / <i>Erysipelotrichales</i> / <i>Erysipelotrichaceae</i> /                                    | <i>II22</i> <sup>-/-</sup>                              | 2.640              | 1.22E-02 |
| <i>Proteobacteria</i> / <i>Alphaproteobacteria</i>                                                                                       | <i>II22</i> <sup>-/-</sup>                              | 2.066              | 4.66E-03 |
| <i>Bacteroidetes</i> / <i>Bacteroidia</i> / <i>Bacteroidales</i> / <i>Bacteroidaceae</i> / <i>Bacteroides</i>                            | <i>II10</i> <sup>-/-</sup> / <i>II22</i> <sup>-/-</sup> | 4.616              | 1.45E-05 |
| <i>Bacteroidetes</i> / <i>Bacteroidia</i> / <i>Bacteroidales</i> / <i>Rikenellaceae</i>                                                  | <i>II10</i> <sup>-/-</sup> / <i>II22</i> <sup>-/-</sup> | 4.237              | 1.53E-06 |

|                                                                                   |                                             |       |          |
|-----------------------------------------------------------------------------------|---------------------------------------------|-------|----------|
| <i>Bacteroidetes/Bacteroidia/Bacteroidales/Rikenellaceae/</i>                     | <i>II10<sup>-/-</sup>II22<sup>-/-</sup></i> | 4.141 | 5.31E-06 |
| <i>Bacteroidetes/Bacteroidia/Bacteroidales/Porphyromonadaceae</i>                 | <i>II10<sup>-/-</sup>II22<sup>-/-</sup></i> | 3.772 | 4.54E-04 |
| <i>Bacteroidetes/Bacteroidia/Bacteroidales/Porphyromonadaceae/Parabacteroides</i> | <i>II10<sup>-/-</sup>II22<sup>-/-</sup></i> | 3.772 | 4.54E-04 |
| <i>Bacteroidetes/Bacteroidia/Bacteroidales/Rikenellaceae/AF12</i>                 | <i>II10<sup>-/-</sup>II22<sup>-/-</sup></i> | 3.535 | 6.47E-08 |
| <i>Tenericutes</i>                                                                | <i>II10<sup>-/-</sup>II22<sup>-/-</sup></i> | 3.261 | 1.25E-07 |
| <i>Tenericutes/Mollicutes</i>                                                     | <i>II10<sup>-/-</sup>II22<sup>-/-</sup></i> | 3.261 | 1.25E-07 |
| <i>Tenericutes/Mollicutes/Anaeroplasmatales</i>                                   | <i>II10<sup>-/-</sup>II22<sup>-/-</sup></i> | 3.095 | 4.24E-09 |
| <i>Tenericutes/Mollicutes/Anaeroplasmatales/Anaeroplasmataceae</i>                | <i>II10<sup>-/-</sup>II22<sup>-/-</sup></i> | 3.093 | 4.24E-09 |
| <i>Tenericutes/Mollicutes/Anaeroplasmatales/Anaeroplasmataceae/Anaeroplasma</i>   | <i>II10<sup>-/-</sup>II22<sup>-/-</sup></i> | 3.092 | 4.24E-09 |
| <i>TM7</i>                                                                        | <i>II10<sup>-/-</sup>II22<sup>-/-</sup></i> | 2.825 | 2.69E-04 |
| <i>TM7/TM7_3</i>                                                                  | <i>II10<sup>-/-</sup>II22<sup>-/-</sup></i> | 2.825 | 2.69E-04 |
| <i>TM7/TM7_3/CW040</i>                                                            | <i>II10<sup>-/-</sup>II22<sup>-/-</sup></i> | 2.825 | 2.69E-04 |
| <i>TM7/TM7_3/CW040/F16</i>                                                        | <i>II10<sup>-/-</sup>II22<sup>-/-</sup></i> | 2.825 | 2.69E-04 |
| <i>TM7/TM7_3/CW040/F16/</i>                                                       | <i>II10<sup>-/-</sup>II22<sup>-/-</sup></i> | 2.825 | 2.69E-04 |
